# Supplementary material for: Technical note: Comparison and interconversion of pH based on different standard states for aerosol acidity characterization
Source: Copernicus journal article supplement (doi:10.5194/acp-18-11125-2018), 2018-08-09
Supplement: Supplementary file 1 [file acp-18-11125-2018-supplement.pdf]

Supplement of Atmos. Chem. Phys., 18, 11125–11133, 2018  
<https://doi.org/10.5194/acp-18-11125-2018-supplement>  
© Author(s) 2018. This work is distributed under  
the Creative Commons Attribution 4.0 License.

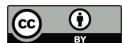

*Supplement of*

## **Technical note: Comparison and interconversion of pH based on different standard states for aerosol acidity characterization**

**Shiguo Jia et al.**

*Correspondence to:* Xuemei Wang (eciwxm@jnu.edu.cn) and Liming Yang (cheylm@nus.edu.sg)

The copyright of individual parts of the supplement might differ from the CC BY 4.0 License.

**Table S1. Summary of reported aerosol pH calculated by thermodynamic models**

| #                               | Location         | Year | Particle size | Model        | F/ R <sup>a</sup> | S/ MS <sup>b</sup> | Particulate species                                                                                                                                                                            | Gases                                   | pH                                                         | References          |
|---------------------------------|------------------|------|---------------|--------------|-------------------|--------------------|------------------------------------------------------------------------------------------------------------------------------------------------------------------------------------------------|-----------------------------------------|------------------------------------------------------------|---------------------|
| <b><u>Molality based pH</u></b> |                  |      |               |              |                   |                    |                                                                                                                                                                                                |                                         |                                                            |                     |
| 1                               | Beijing, China   | 2014 | PM2.5         | E-AIM-IV     | F&R               | S                  | Na <sup>+</sup> , NH <sub>4</sub> <sup>+</sup> , SO <sub>4</sub> <sup>2-</sup> , NO <sub>3</sub> <sup>-</sup> , Cl <sup>-</sup> , K <sup>+</sup><br>(K <sup>+</sup> taken as Na <sup>+</sup> ) | NH <sub>3</sub> , HNO <sub>3</sub>      | 3.5 to 5.3 for forward mode and -2 to 10 for reverse mode. | (Song et al., 2018) |
|                                 |                  |      |               | ISORROPIA-II | F&R               | S&MS               | Na <sup>+</sup> , K <sup>+</sup> , Ca <sup>2+</sup> , Mg <sup>2+</sup> , NH <sub>4</sub> <sup>+</sup> , SO <sub>4</sub> <sup>2-</sup> , NO <sub>3</sub> <sup>-</sup> , Cl <sup>-</sup>         |                                         |                                                            |                     |
| 2                               | Guangzhou, China | 2013 | PM2.5         | E-AIM-III    | F                 | S                  | Na <sup>+</sup> , NH <sub>4</sub> <sup>+</sup> , SO <sub>4</sub> <sup>2-</sup> , NO <sub>3</sub> <sup>-</sup> , Cl <sup>-</sup>                                                                | NH <sub>3</sub> , NO <sub>3</sub> , HCl | 2.4 ± 0.3                                                  | (Jia et al., 2018)  |
| 3                               | Southeastern US  | 2013 | PM1 and PM2.5 | AIOMFAC      | R                 | MS                 | NH <sub>4</sub> <sup>+</sup> , SO <sub>4</sub> <sup>2-</sup> , organic compounds <sup>c</sup>                                                                                                  | - <sup>g</sup>                          | 1.4±1.2 (EQLB)<br>1.3±1.2 (CLLPS)                          | (Pye et al., 2018)  |
|                                 |                  |      |               | AIOMFAC      | R                 | MS                 | Na <sup>+</sup> , NH <sub>4</sub> <sup>+</sup> , SO <sub>4</sub> <sup>2-</sup> , NO <sub>3</sub> <sup>-</sup> , Cl <sup>-</sup> , organic compounds <sup>c</sup>                               | - <sup>g</sup>                          | 1.5±2.0 (EQLB)<br>1.3±2.1 (CLLPS)                          |                     |
|                                 |                  |      |               | ISORROPIA-II | R                 | - <sup>g</sup>     | Na <sup>+</sup> , K <sup>+</sup> , Ca <sup>2+</sup> , Mg <sup>2+</sup> , NH <sub>4</sub> <sup>+</sup> , SO <sub>4</sub> <sup>2-</sup> , NO <sub>3</sub> <sup>-</sup> , Cl <sup>-</sup>         | - <sup>g</sup>                          | 0.7±2.5                                                    |                     |
|                                 |                  |      |               | ISORROPIA-II | F                 | - <sup>g</sup>     | Na <sup>+</sup> , K <sup>+</sup> , Ca <sup>2+</sup> , Mg <sup>2+</sup> , NH <sub>4</sub> <sup>+</sup> , SO <sub>4</sub> <sup>2-</sup> , NO <sub>3</sub> <sup>-</sup> , Cl <sup>-</sup>         | NH <sub>3</sub>                         | 1.1±0.7                                                    |                     |

| #  | Location                | Year         | Particle size       | Model        | F/ R <sup>a</sup> | S/ MS <sup>b</sup> | Particulate species                                                                                                                                                                                 | Gases                                                | pH                                                                     | References                 |
|----|-------------------------|--------------|---------------------|--------------|-------------------|--------------------|-----------------------------------------------------------------------------------------------------------------------------------------------------------------------------------------------------|------------------------------------------------------|------------------------------------------------------------------------|----------------------------|
| 4  | Beijing, China          | 2015& 2016   | PM2.5               | ISORROPIA    | F                 | MS                 | Na <sup>+</sup> , K <sup>+</sup> , Ca <sup>2+</sup> , Mg <sup>2+</sup> , NH <sub>4</sub> <sup>+</sup> , SO <sub>4</sub> <sup>2-</sup> , NO <sub>3</sub> <sup>-</sup> , Cl <sup>-</sup> <sup>d</sup> | NH <sub>3</sub> , NO <sub>3</sub> , HCl              | 4.2 ± 0.5                                                              | (Liu et al., 2017)         |
| 5  | Baltimore & Chicago, US | 2011 to 2015 | PM2.5               | ISORROPIA-II | F                 | MS                 | Na <sup>+</sup> , K <sup>+</sup> , Ca <sup>2+</sup> , Mg <sup>2+</sup> , NH <sub>4</sub> <sup>+</sup> , SO <sub>4</sub> <sup>2-</sup> , NO <sub>3</sub> <sup>-</sup> , Cl <sup>-</sup>              | NH <sub>3</sub>                                      | ~1.0 to 2.7 <sup>e</sup>                                               | (Battaglia et al., 2017)   |
| 6  | Southeastern US         | 2010         | PM1 & PM2.5         | ISORROPIA-II | F                 | MS                 | Na <sup>+</sup> , K <sup>+</sup> , NH <sub>4</sub> <sup>+</sup> , SO <sub>4</sub> <sup>2-</sup> , NO <sub>3</sub> <sup>-</sup> , Cl <sup>-</sup>                                                    | NH <sub>3</sub> , NO <sub>3</sub> , HCl              | 1.9±0.5 for PM1 and 2.7±0.3 for PM2.5                                  | (Guo et al., 2017a)        |
| 7  | Beijing & Xi'an, China  | 2013         | PM1 & PM2.5         | ISORROPIA-II | F                 | MS                 | Na <sup>+</sup> , K <sup>+</sup> , Ca <sup>2+</sup> , Mg <sup>2+</sup> , NH <sub>4</sub> <sup>+</sup> , SO <sub>4</sub> <sup>2-</sup> , NO <sub>3</sub> <sup>-</sup> , Cl <sup>-</sup>              | NH <sub>3</sub>                                      | 4.5 for Beijing and 5 for Xi'an                                        | (Guo et al., 2017b)        |
| 8  | Atlanta, US             | 2016         | <18 μm <sup>f</sup> | ISORROPIA-II | F                 | - <sup>g</sup>     | Na <sup>+</sup> , K <sup>+</sup> , Ca <sup>2+</sup> , Mg <sup>2+</sup> , NH <sub>4</sub> <sup>+</sup> , SO <sub>4</sub> <sup>2-</sup> , NO <sub>3</sub> <sup>-</sup> , Cl <sup>-</sup>              | NH <sub>3</sub> , NO <sub>3</sub> , HCl <sup>h</sup> | 1 to 2 for fine particle;<br>~6 to ~7 for coarse particle <sup>e</sup> | (Fang et al., 2017)        |
| 9  | Finokalia, Greece       | 2012         | PM1 and PM10        | ISORROPIA-II | F                 | MS                 | Na <sup>+</sup> , K <sup>+</sup> , Ca <sup>2+</sup> , Mg <sup>2+</sup> , NH <sub>4</sub> <sup>+</sup> , SO <sub>4</sub> <sup>2-</sup> , NO <sub>3</sub> <sup>-</sup> , Cl <sup>-</sup> <sup>d</sup> | NH <sub>3</sub> <sup>i</sup>                         | 0.5 to 2.8                                                             | (Bougiatioti et al., 2016) |
| 10 | Northeastern US         | 2015         | PM1                 | ISORROPIA-II | F                 | MS                 | Na <sup>+</sup> , K <sup>+</sup> , Ca <sup>2+</sup> , Mg <sup>2+</sup> , NH <sub>4</sub> <sup>+</sup> , SO <sub>4</sub> <sup>2-</sup> , NO <sub>3</sub> <sup>-</sup> , Cl <sup>-</sup>              | NH <sub>3</sub> <sup>h</sup>                         | 0.77 ± 0.96                                                            | (Guo et al., 2016)         |
| 11 | Southeastern US         | 2012& 2013   | PM1 and PM 2.5      | ISORROPIA-II | F                 | MS                 | Na <sup>+</sup> , K <sup>+</sup> , Ca <sup>2+</sup> , Mg <sup>2+</sup> , NH <sub>4</sub> <sup>+</sup> , SO <sub>4</sub> <sup>2-</sup> , NO <sub>3</sub> <sup>-</sup> , Cl <sup>-</sup> <sup>d</sup> | NH <sub>3</sub>                                      | 0.94 ± 0.59                                                            | (Guo et al., 2015)         |
| 12 | Southeastern US         | 2013         | PM1                 | ISORROPIA-II | F                 | MS                 | Na <sup>+</sup> , K <sup>+</sup> , Ca <sup>2+</sup> , Mg <sup>2+</sup> , NH <sub>4</sub> <sup>+</sup> , SO <sub>4</sub> <sup>2-</sup> , NO <sub>3</sub> <sup>-</sup> , Cl <sup>-</sup>              | NH <sub>3</sub>                                      | 0-2                                                                    | (Xu et al., 2015)          |

| #                               | Location         | Year        | Particle size     | Model     | F/ R <sup>a</sup> | S/ MS <sup>b</sup> | Particulate species                                                                                                             | Gases          | pH                        | References            |
|---------------------------------|------------------|-------------|-------------------|-----------|-------------------|--------------------|---------------------------------------------------------------------------------------------------------------------------------|----------------|---------------------------|-----------------------|
| <b><u>Molarity based pH</u></b> |                  |             |                   |           |                   |                    |                                                                                                                                 |                |                           |                       |
| 13                              | Beijing, China   | 2013        | PM <sub>2.5</sub> | E-AIM-IV  | R                 | - <sup>g</sup>     | Na <sup>+</sup> , NH <sub>4</sub> <sup>+</sup> , SO <sub>4</sub> <sup>2-</sup> , NO <sub>3</sub> <sup>-</sup> , Cl <sup>-</sup> | - <sup>g</sup> | 1.1                       | (Tian et al., 2018)   |
| 14                              | Chengdu, China   | 2011        | 0.18 to 1.8 μm    | E-AIM-II  | R                 | - <sup>g</sup>     | SO <sub>4</sub> <sup>2-</sup> , NH <sub>4</sub> <sup>+</sup> , NO <sub>3</sub> <sup>-</sup>                                     | - <sup>g</sup> | -1.11                     | (Cheng et al., 2015)  |
| 15                              | Singapore        | 2011        | PM <sub>2.5</sub> | E-AIM-III | R                 | - <sup>g</sup>     | Na <sup>+</sup> , NH <sub>4</sub> <sup>+</sup> , SO <sub>4</sub> <sup>2-</sup> , NO <sub>3</sub> <sup>-</sup> , Cl <sup>-</sup> | - <sup>g</sup> | 0.48 & 0.72 (day & night) | (Behera et al., 2013) |
| 16                              | Jinan, China     | 2006 & 2007 | PM <sub>1</sub>   | E-AIM-II  | R                 | - <sup>g</sup>     | NH <sub>4</sub> <sup>+</sup> , SO <sub>4</sub> <sup>2-</sup> , NO <sub>3</sub> <sup>-</sup>                                     | - <sup>g</sup> | -1                        | (Cheng et al., 2011)  |
| 17                              | Hong Kong        | 2008 & 2009 | PM <sub>2.5</sub> | E-AIM-III | R                 | - <sup>g</sup>     | Na <sup>+</sup> , NH <sub>4</sub> <sup>+</sup> , SO <sub>4</sub> <sup>2-</sup> , NO <sub>3</sub> <sup>-</sup> , Cl <sup>-</sup> | - <sup>g</sup> | -0.45 to 0.59             | (Xue et al., 2011)    |
| 18                              | Beijing, China   | 2005        | PM <sub>2.5</sub> | AIM-II    | R                 | - <sup>g</sup>     | NH <sub>4</sub> <sup>+</sup> , SO <sub>4</sub> <sup>2-</sup> , NO <sub>3</sub> <sup>-</sup>                                     | - <sup>g</sup> | -0.52±0.62                | (Pathak et al., 2009) |
|                                 | Shanghai, China  | 2005        |                   |           | R                 | - <sup>g</sup>     |                                                                                                                                 | -0.77±0.67     |                           |                       |
|                                 | Lanzhou, China   | 2006,       |                   |           | R                 | - <sup>g</sup>     |                                                                                                                                 | -0.38±0.64     |                           |                       |
|                                 | Guangzhou, China | 2004        |                   |           | R                 | - <sup>g</sup>     |                                                                                                                                 | - <sup>g</sup> | 0.61±0.71                 |                       |
| 19                              | Hong Kong        | 2001        | PM <sub>10</sub>  | AIM-II    | R                 | - <sup>g</sup>     | NH <sub>4</sub> <sup>+</sup> , SO <sub>4</sub> <sup>2-</sup> , NO <sub>3</sub> <sup>-</sup>                                     | - <sup>g</sup> | 0.25                      | (Pathak et al., 2004) |

| #                                    | Location         | Year         | Particle size     | Model           | F/ R <sup>a</sup> | S/ MS <sup>b</sup> | Particulate species                                                                                                                                                                                                                                         | Gases                                | pH                     | References               |
|--------------------------------------|------------------|--------------|-------------------|-----------------|-------------------|--------------------|-------------------------------------------------------------------------------------------------------------------------------------------------------------------------------------------------------------------------------------------------------------|--------------------------------------|------------------------|--------------------------|
| <b><u>Male fraction based pH</u></b> |                  |              |                   |                 |                   |                    |                                                                                                                                                                                                                                                             |                                      |                        |                          |
| 20                                   | Southeastern US  | 1999 to 2014 | PM2.5             | ISORROPIA-II    | F                 | - <sup>g</sup>     | Na <sup>+</sup> , K <sup>+</sup> , Ca <sup>2+</sup> , Mg <sup>2+</sup> , NH <sub>4</sub> <sup>+</sup> , SO <sub>4</sub> <sup>2-</sup> , NO <sub>3</sub> <sup>-</sup> , Cl <sup>-</sup>                                                                      | NH <sub>3</sub> <sup>i</sup>         | 0-2                    | (Weber et al., 2016)     |
| 21                                   | Mexico City, US  | 2006         | PM2.5             | ISORROPIA-II    | R                 | MS                 | Na <sup>+</sup> , K <sup>+</sup> , Ca <sup>2+</sup> , Mg <sup>2+</sup> , NH <sub>4</sub> <sup>+</sup> , SO <sub>4</sub> <sup>2-</sup> , NO <sub>3</sub> <sup>-</sup> , Cl <sup>-</sup>                                                                      | - <sup>g</sup>                       | 1.98                   | (Hennigan et al., 2015)  |
|                                      |                  |              |                   | E-AIM-II and IV | R                 | S                  | Na <sup>+</sup> , NH <sub>4</sub> <sup>+</sup> , SO <sub>4</sub> <sup>2-</sup> , NO <sub>3</sub> <sup>-</sup> , and Cl <sup>-</sup> for AIM-IV and NH <sub>4</sub> <sup>+</sup> , SO <sub>4</sub> <sup>2-</sup> and NO <sub>3</sub> <sup>-</sup> for AIM-II | - <sup>g</sup>                       | 2.36                   |                          |
|                                      |                  |              |                   | ISORROPIA-II,   | F                 | MS                 | Na <sup>+</sup> , K <sup>+</sup> , Ca <sup>2+</sup> , Mg <sup>2+</sup> , NH <sub>4</sub> <sup>+</sup> , SO <sub>4</sub> <sup>2-</sup> , NO <sub>3</sub> <sup>-</sup> , Cl <sup>-</sup>                                                                      | NH <sub>3</sub> , HNO <sub>3</sub>   | 3.31                   |                          |
|                                      |                  |              |                   | E-AIM-II and IV | F                 | S                  | Na <sup>+</sup> , NH <sub>4</sub> <sup>+</sup> , SO <sub>4</sub> <sup>2-</sup> , NO <sub>3</sub> <sup>-</sup> , Cl <sup>-</sup> for AIM-IV and NH <sub>4</sub> <sup>+</sup> , SO <sub>4</sub> <sup>2-</sup> , NO <sub>3</sub> <sup>-</sup> for AIM-II       | NH <sub>3</sub> and HNO <sub>3</sub> | 3.24                   |                          |
| 22                                   | Po Valley, Italy | 2009         | PM2.5             | E-AIM-IV        | R                 | - <sup>g</sup>     | Na <sup>+</sup> , NH <sub>4</sub> <sup>+</sup> , SO <sub>4</sub> <sup>2-</sup> , NO <sub>3</sub> <sup>-</sup> , Cl                                                                                                                                          | - <sup>g</sup>                       | 2.7 to 3.8             | (Squizzato et al., 2013) |
| 23                                   | Beijing, China   | 2005& 2006   | PM <sub>2.5</sub> | E-AIM-II        | R                 | - <sup>g</sup>     | NH <sub>4</sub> <sup>+</sup> , SO <sub>4</sub> <sup>2-</sup> and NO <sub>3</sub> <sup>-</sup>                                                                                                                                                               | - <sup>g</sup>                       | 1.2 ±1.1               | (He et al., 2012)        |
| 24                                   | Pittsburgh, US   | 2002         | PM1               | E-AIM-II        | R                 | - <sup>g</sup>     | SO <sub>4</sub> <sup>2-</sup> , NH <sub>4</sub> <sup>+</sup> , NO <sub>3</sub> <sup>-</sup>                                                                                                                                                                 | - <sup>g</sup>                       | ~0.5 to 5 <sup>f</sup> | (Zhang et al., 2007)     |

| #                       | Location          | Year         | Particle size       | Model        | F/ R <sup>a</sup> | S/ MS <sup>b</sup> | Particulate species                                                                                                                                                                     | Gases                        | pH                      | References                  |
|-------------------------|-------------------|--------------|---------------------|--------------|-------------------|--------------------|-----------------------------------------------------------------------------------------------------------------------------------------------------------------------------------------|------------------------------|-------------------------|-----------------------------|
| <b>pH not specified</b> |                   |              |                     |              |                   |                    |                                                                                                                                                                                         |                              |                         |                             |
| 25                      | Beijing, China    | 2014& 2015   | PM2.5               | ISORROPIA-II | F                 | S                  | Na <sup>+</sup> , K <sup>+</sup> , Ca <sup>2+</sup> , Mg <sup>2+</sup> , NH <sub>4</sub> <sup>+</sup> , SO <sub>4</sub> <sup>2-</sup> , NO <sub>3</sub> <sup>-</sup> , Cl <sup>-</sup>  | NH <sub>3</sub> <sup>j</sup> | 7.6 ± 0.1               | (He et al., 2018)           |
| 26                      | Beijing, China    | 2014         | PM2.5               | ISORROPIA-II | F                 | MS                 | Na <sup>+</sup> , K <sup>+</sup> , Ca <sup>2+</sup> , Mg <sup>2+</sup> , NH <sub>4</sub> <sup>+</sup> , SO <sub>4</sub> <sup>2-</sup> , NO <sub>3</sub> <sup>-</sup> , Cl <sup>-</sup>  | - <sup>g</sup>               | 4.1                     | (Tan et al., 2018)          |
| 27                      | Tianjin, China    | 2014& 2015   | PM2.5               | ISORROPIA-II | F                 | MS                 | Na <sup>+</sup> , K <sup>+</sup> , Ca <sup>2+</sup> , Mg <sup>2+</sup> , NH <sub>4</sub> <sup>+</sup> , SO <sub>4</sub> <sup>2-</sup> , NO <sub>3</sub> <sup>-</sup> , Cl <sup>-</sup>  | NH <sub>3</sub>              | 4.9±0.4                 | (Shi et al., 2017)          |
| 28                      | Beijing, China    | 2015         | PM1                 | ISORROPIA-II | F                 | S <sup>k</sup>     | NH <sub>3</sub> , NH <sub>4</sub> <sup>+</sup> , SO <sub>4</sub> <sup>2-</sup> , NO <sub>3</sub> <sup>-</sup> , Cl <sup>-</sup>                                                         | NH <sub>3</sub>              | 7.6 ± 0.0               | (Wang et al., 2016)         |
|                         | Xi'an, China      | 2012         | PM2.5               | ISORROPIA-II | F                 | S <sup>k</sup>     | Na <sup>+</sup> , K <sup>+</sup> , Ca <sup>2+</sup> , Mg <sup>2+</sup> , NH <sub>4</sub> <sup>+</sup> , SO <sub>4</sub> <sup>2-</sup> , NO <sub>3</sub> <sup>-</sup> , Cl <sup>-</sup>  |                              | 7.0 ± 1.3               |                             |
| 29                      | Beijing, China    | 2013         | PM2.5               | ISORROPIA-II | F                 | MS                 | Na <sup>+</sup> , K <sup>+</sup> , Ca <sup>2+</sup> , Mg <sup>2+</sup> , NH <sub>4</sub> <sup>+</sup> , SO <sub>4</sub> <sup>2-</sup> , NO <sub>3</sub> <sup>-</sup> , Cl <sup>-c</sup> | NH <sub>3</sub> <sup>j</sup> | 4.4 ± 0.6               | (Cheng et al., 2016)        |
|                         |                   |              |                     |              |                   | MS                 |                                                                                                                                                                                         |                              | 5.4                     |                             |
| 30                      | São Paulo, Brazil | 2012         | <18 μm <sup>f</sup> | E-AIM        | R                 | - <sup>g</sup>     | - <sup>g</sup>                                                                                                                                                                          | - <sup>g</sup>               | 6.2                     | (Vieira-Filho et al., 2016) |
|                         |                   |              |                     |              | R                 | - <sup>g</sup>     |                                                                                                                                                                                         |                              | 4.1 to 5.4 <sup>e</sup> |                             |
| 31                      | Hong Kong         | 1996 to 1998 | PM1                 | AIM-II       | R                 | - <sup>g</sup>     | NH <sub>4</sub> <sup>+</sup> , SO <sub>4</sub> <sup>2-</sup> , NO <sub>3</sub> <sup>-</sup>                                                                                             | - <sup>g</sup>               | -2.5 to 1.5             | (Yao et al., 2007)          |

| #  | Location  | Year | Particle size | Model       | F/ R <sup>a</sup> | S/ MS <sup>b</sup> | Particulate species                                                                                                                                                                          | Gases                                      | pH   | References         |
|----|-----------|------|---------------|-------------|-------------------|--------------------|----------------------------------------------------------------------------------------------------------------------------------------------------------------------------------------------|--------------------------------------------|------|--------------------|
| 32 | Hong Kong | 2000 | PM2.5         | AIM-II      | R                 | - <sup>g</sup>     | NH <sub>4</sub> <sup>+</sup> , SO <sub>4</sub> <sup>2-</sup> , NO <sub>3</sub> <sup>-</sup>                                                                                                  | - <sup>g</sup>                             | -0.4 | (Yao et al., 2006) |
|    |           |      |               | SCAPE2      | F                 | - <sup>g</sup>     | Na <sup>+</sup> , K <sup>+</sup> , Ca <sup>2+</sup> , Mg <sup>2+</sup> ,<br>NH <sub>4</sub> <sup>+</sup> , SO <sub>4</sub> <sup>2-</sup> , NO <sub>3</sub> <sup>-</sup> ,<br>Cl <sup>-</sup> | NH <sub>3</sub> , NO <sub>3</sub> ,<br>HCl | 2.3  |                    |
|    |           |      |               | ISORROPIA-I | F                 | - <sup>g</sup>     | Na <sup>+</sup> , NH <sub>4</sub> <sup>+</sup> , SO <sub>4</sub> <sup>2-</sup> ,<br>NO <sub>3</sub> <sup>-</sup> , Cl <sup>-</sup>                                                           | NH <sub>3</sub> , NO <sub>3</sub> ,<br>HCl | 3.9  |                    |
|    |           |      |               | SCAPE2      | F                 | - <sup>g</sup>     | Na <sup>+</sup> , NH <sub>4</sub> <sup>+</sup> , SO <sub>4</sub> <sup>2-</sup> ,<br>NO <sub>3</sub> <sup>-</sup> , Cl <sup>-</sup>                                                           | NH <sub>3</sub> , NO <sub>3</sub> ,<br>HCl | 1.9  |                    |

Note: <sup>a</sup> *F* means forward and *R* means reverse. <sup>b</sup> *S* means stable and *MS* means metastable. <sup>c</sup> Organic compounds were considered either in complete liquid–liquid phase separation (CLLPS) or equilibrium (EQLB) mode; Ca<sup>2+</sup>, K<sup>+</sup> and Mg<sup>2+</sup> were taken as Na<sup>+</sup>. <sup>d</sup> Aerosol water content associated with organic compounds considered; <sup>e</sup> Data extracted from figure; <sup>f</sup> Size segregated samples; <sup>g</sup> - means not specified; <sup>h</sup> Assuming NH<sub>4</sub><sup>+</sup> (total) = NH<sub>3</sub> (gas phase) +NH<sub>4</sub><sup>+</sup> (particle phase); <sup>i</sup> Estimated based on iteration; <sup>j</sup> NH<sub>3</sub> estimated based on empirical equation; <sup>k</sup> Obtained from Song et al. (2018).

**Table S2. A summary of estimation methods of parameters for pH calculation based on different standard states.**

| Parameter             | E-AIM-IV             | ISORROPIA-II         | AIOMFAC              |
|-----------------------|----------------------|----------------------|----------------------|
| <u>Molar fraction</u> |                      |                      |                      |
| $x_H$                 | output               | Eq. (7)              | output               |
| $f_H$                 | output               | 1 <sup>a</sup>       | Eq. (4)              |
| <u>Molality</u>       |                      |                      |                      |
| $m_H$                 | output               | output               | output               |
| $\gamma_H$            | Eq. (4)              | 1 <sup>a</sup>       | output               |
| <u>Molarity</u>       |                      |                      |                      |
| $c_H$                 | Eq. (8) <sup>b</sup> | Eq. (8) <sup>b</sup> | Eq. (8) <sup>b</sup> |
| $y_H$                 | Eq. (6)              | 1 <sup>a</sup>       | Eq. (6)              |

Note: <sup>a</sup> Activity coefficient is assumed to be 1; <sup>b</sup> the density of aerosol solution is based on the result from E-AIM-IV.



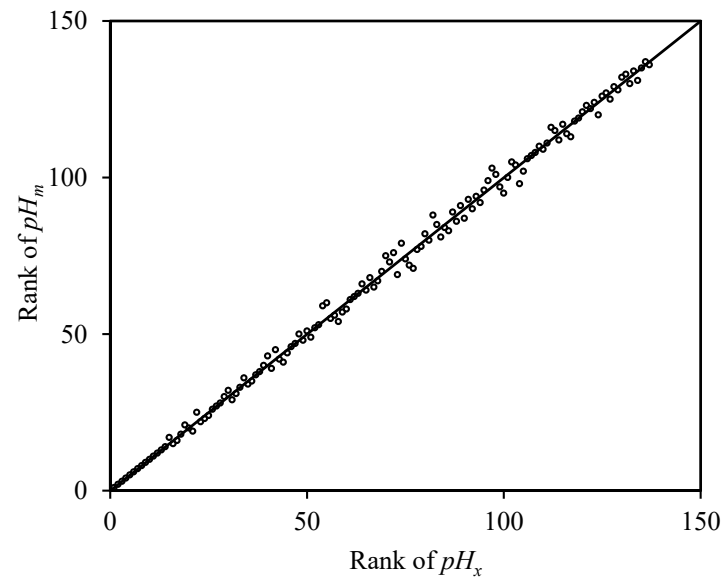

**Figure S1.** Comparison of the rank of  $pH_x$  and  $pH_m$

## Reference

- Battaglia, M. A., Douglas, S., and Hennigan, C. J.: Effect of the Urban Heat Island on Aerosol pH, *Environ. Sci. Technol.*, 51, 13095-13103, 10.1021/acs.est.7b02786, 2017.
- Behera, S. N., Betha, R., Liu, P., and Balasubramanian, R.: A study of diurnal variations of PM<sub>2.5</sub> acidity and related chemical species using a new thermodynamic equilibrium model, *Sci. Total Environ.*, 452–453, 286-295, <http://dx.doi.org/10.1016/j.scitotenv.2013.02.062>, 2013.
- Bougiatioti, A., Nikolaou, P., Stavroulas, I., Kouvarakis, G., Weber, R., Nenes, A., Kanakidou, M., and Mihalopoulos, N.: Particle water and pH in the eastern Mediterranean: source variability and implications for nutrient availability, *Atmos. Chem. Phys.*, 16, 4579-4591, 10.5194/acp-16-4579-2016, 2016.
- Cheng, C., Wang, G., Meng, J., Wang, Q., Cao, J., Li, J., and Wang, J.: Size-resolved airborne particulate oxalic and related secondary organic aerosol species in the urban atmosphere of Chengdu, China, *Atmos. Res.*, 161-162, 134-142, <https://doi.org/10.1016/j.atmosres.2015.04.010>, 2015.
- Cheng, S.-h., Yang, L.-x., Zhou, X.-h., Xue, L.-k., Gao, X.-m., Zhou, Y., and Wang, W.-x.: Size-fractionated water-soluble ions, situ pH and water content in aerosol on hazy days and the influences on visibility impairment in Jinan, China, *Atmos. Environ.*, 45, 4631-4640, <https://doi.org/10.1016/j.atmosenv.2011.05.057>, 2011.
- Cheng, Y., Zheng, G., Wei, C., Mu, Q., Zheng, B., Wang, Z., Gao, M., Zhang, Q., He, K., Carmichael, G., Pöschl, U., and Su, H.: Reactive nitrogen chemistry in aerosol water as a source of sulfate during haze events in China, *Science Advances*, 2, 10.1126/sciadv.1601530, 2016.
- Fang, T., Guo, H., Zeng, L., Verma, V., Nenes, A., and Weber, R. J.: Highly Acidic Ambient Particles, Soluble Metals, and Oxidative Potential: A Link between Sulfate and Aerosol Toxicity, *Environ. Sci. Technol.*, 51, 2611-2620, 10.1021/acs.est.6b06151, 2017.
- Guo, H., Xu, L., Bougiatioti, A., Cerully, K. M., Capps, S. L., Hite Jr, J. R., Carlton, A. G., Lee, S. H., Bergin, M. H., Ng, N. L., Nenes, A., and Weber, R. J.: Fine-particle water and pH in the southeastern United States, *Atmos. Chem. Phys.*, 15, 5211-5228, 10.5194/acp-15-5211-2015, 2015.
- Guo, H., P., S. A., Pedro, C. J., C., S. J., D., L. H. F., E., D. J., L., J. J., A., T. J., S., B. S., Athanasios, N., and J., W. R.: Fine particle pH and the partitioning of nitric acid during winter in the northeastern United States, *J. Geophys. Res.: Atmos.*, 121, 10,355-310,376, doi:10.1002/2016JD025311, 2016.
- Guo, H., Liu, J., Froyd, K. D., Roberts, J. M., Veres, P. R., Hayes, P. L., Jimenez, J. L., Nenes, A., and Weber, R. J.: Fine particle pH and gas–particle phase partitioning of inorganic species in Pasadena, California, during the 2010 CalNex campaign, *Atmos. Chem. Phys.*, 17, 5703-5719, 10.5194/acp-17-5703-2017, 2017a.
- Guo, H., Weber, R. J., and Nenes, A.: High levels of ammonia do not raise fine particle pH sufficiently to yield nitrogen oxide-dominated sulfate production, *Scientific Reports*, 7, 12109, 10.1038/s41598-017-11704-0, 2017b.
- He, K., Zhao, Q., Ma, Y., Duan, F., Yang, F., Shi, Z., and Chen, G.: Spatial and seasonal variability of PM<sub>2.5</sub> acidity at two Chinese megacities: insights into the formation of secondary inorganic aerosols, *Atmos. Chem. Phys.*, 12, 1377-1395, 10.5194/acp-12-1377-2012, 2012.
- He, P., Alexander, B., Geng, L., Chi, X., Fan, S., Zhan, H., Kang, H., Zheng, G., Cheng, Y., Su, H., Liu, C., and Xie, Z.: Isotopic constraints on heterogeneous sulfate production in Beijing haze, *Atmos. Chem. Phys.*, 18, 5515-5528, 10.5194/acp-18-5515-2018, 2018.
- Hennigan, C. J., Izumi, J., Sullivan, A. P., Weber, R. J., and Nenes, A.: A critical evaluation of proxy methods used to estimate the acidity of atmospheric particles, *Atmos. Chem. Phys.*, 15, 2775-2790, 10.5194/acp-15-2775-2015, 2015.
- Jia, S., Sarkar, S., Zhang, Q., Wang, X., Wu, L., Chen, W., Huang, M., Zhou, S., Zhang, J., Yuan, L., and Yang, L.: Characterization of diurnal variations of PM<sub>2.5</sub> acidity using an open thermodynamic system: A case study of Guangzhou, China, *Chemosphere*, 202, 677-685, <https://doi.org/10.1016/j.chemosphere.2018.03.127>, 2018.
- Liu, M., Yu, S., Tian, Z., Zhenying, X., Caiqing, Y., Mei, Z., Zhijun, W., Min, H., Yusheng, W., and Tong, Z.: Fine particle pH during severe haze episodes in northern China, *Geophys. Res. Lett.*, 44, 5213-5221, doi:10.1002/2017GL073210, 2017.
- Pathak, R. K., Yao, X., and Chan, C. K.: Sampling Artifacts of Acidity and Ionic Species in PM<sub>2.5</sub>, *Environ. Sci. Technol.*, 38, 254-259, 10.1021/es0342244, 2004.
- Pathak, R. K., Wu, W. S., and Wang, T.: Summertime PM<sub>2.5</sub> ionic species in four major cities of China: nitrate formation in an ammonia-deficient atmosphere, *Atmos. Chem. Phys.*, 9, 1711-1722, 10.5194/acp-9-1711-2009, 2009.

- Pye, H. O. T., Zuend, A., Fry, J. L., Isaacman-VanWertz, G., Capps, S. L., Appel, K. W., Foroutan, H., Xu, L., Ng, N. L., and Goldstein, A. H.: Coupling of organic and inorganic aerosol systems and the effect on gas–particle partitioning in the southeastern US, *Atmos. Chem. Phys.*, 18, 357-370, 10.5194/acp-18-357-2018, 2018.
- Shi, G., Xu, J., Peng, X., Xiao, Z., Chen, K., Tian, Y., Guan, X., Feng, Y., Yu, H., Nenes, A., and Russell, A. G.: pH of Aerosols in a Polluted Atmosphere: Source Contributions to Highly Acidic Aerosol, *Environ. Sci. Technol.*, 51, 4289-4296, 10.1021/acs.est.6b05736, 2017.
- Song, S., Gao, M., Xu, W., Shao, J., Shi, G., Wang, S., Wang, Y., Sun, Y., and McElroy, M. B.: Fine-particle pH for Beijing winter haze as inferred from different thermodynamic equilibrium models, *Atmos. Chem. Phys.*, 18, 7423-7438, 10.5194/acp-18-7423-2018, 2018.
- Squizzato, S., Masiol, M., Brunelli, A., Pistollato, S., Tarabotti, E., Rampazzo, G., and Pavoni, B.: Factors determining the formation of secondary inorganic aerosol: a case study in the Po Valley (Italy), *Atmos. Chem. Phys.*, 13, 1927-1939, 10.5194/acp-13-1927-2013, 2013.
- Tan, T., Hu, M., Li, M., Guo, Q., Wu, Y., Fang, X., Gu, F., Wang, Y., and Wu, Z.: New insight into PM<sub>2.5</sub> pollution patterns in Beijing based on one-year measurement of chemical compositions, *Sci. Total Environ.*, 621, 734-743, <https://doi.org/10.1016/j.scitotenv.2017.11.208>, 2018.
- Tian, S., Pan, Y., and Wang, Y.: Ion balance and acidity of size-segregated particles during haze episodes in urban Beijing, *Atmos. Res.*, 201, 159-167, <https://doi.org/10.1016/j.atmosres.2017.10.016>, 2018.
- Vieira-Filho, M., Pedrotti, J. J., and Fornaro, A.: Water-soluble ions species of size-resolved aerosols: Implications for the atmospheric acidity in São Paulo megacity, Brazil, *Atmos. Res.*, 181, 281-287, <https://doi.org/10.1016/j.atmosres.2016.07.006>, 2016.
- Weber, R. J., Guo, H., Russell, A. G., and Nenes, A.: High aerosol acidity despite declining atmospheric sulfate concentrations over the past 15 years, *Nature Geosci.*, 9, 282-285, 10.1038/ngeo2665, 2016.
- Xu, L., Guo, H., Boyd, C. M., Klein, M., Bougiatioti, A., Cerully, K. M., Hite, J. R., Isaacman-VanWertz, G., Kreisberg, N. M., Knote, C., Olson, K., Koss, A., Goldstein, A. H., Hering, S. V., de Gouw, J., Baumann, K., Lee, S.-H., Nenes, A., Weber, R. J., and Ng, N. L.: Effects of anthropogenic emissions on aerosol formation from isoprene and monoterpenes in the southeastern United States, *Proceedings of the National Academy of Sciences*, 112, 37-42, 10.1073/pnas.1417609112, 2015.
- Xue, J., Lau, A. K. H., and Yu, J. Z.: A study of acidity on PM<sub>2.5</sub> in Hong Kong using online ionic chemical composition measurements, *Atmos. Environ.*, 45, 7081-7088, [j.atmosenv.2011.09.040](https://doi.org/10.1016/j.atmosenv.2011.09.040), 2011.
- Yao, X., Yan Ling, T., Fang, M., and Chan, C. K.: Comparison of thermodynamic predictions for in situ pH in PM<sub>2.5</sub>, *Atmos. Environ.*, 40, 2835-2844, [j.atmosenv.2006.01.006](https://doi.org/10.1016/j.atmosenv.2006.01.006), 2006.
- Yao, X., Ling, T. Y., Fang, M., and Chan, C. K.: Size dependence of in situ pH in submicron atmospheric particles in Hong Kong, *Atmos. Environ.*, 41, 382-393, [j.atmosenv.2006.07.037](https://doi.org/10.1016/j.atmosenv.2006.07.037), 2007.
- Zhang, Q., Jimenez, J. L., Worsnop, D. R., and Canagaratna, M.: A Case Study of Urban Particle Acidity and Its Influence on Secondary Organic Aerosol, *Environ. Sci. Technol.*, 41, 3213-3219, 10.1021/es061812j, 2007.
